# Supplementary material for: Ethylene Inhibits Anthocyanin Biosynthesis by Repressing the R2R3-MYB Regulator SlAN2-like in Tomato
Source: MDPI journal article supplement (doi:10.3390/ijms23147648), 2022-07-11
Supplement: s1 [file s1]

## Appendix

### Supporting Information

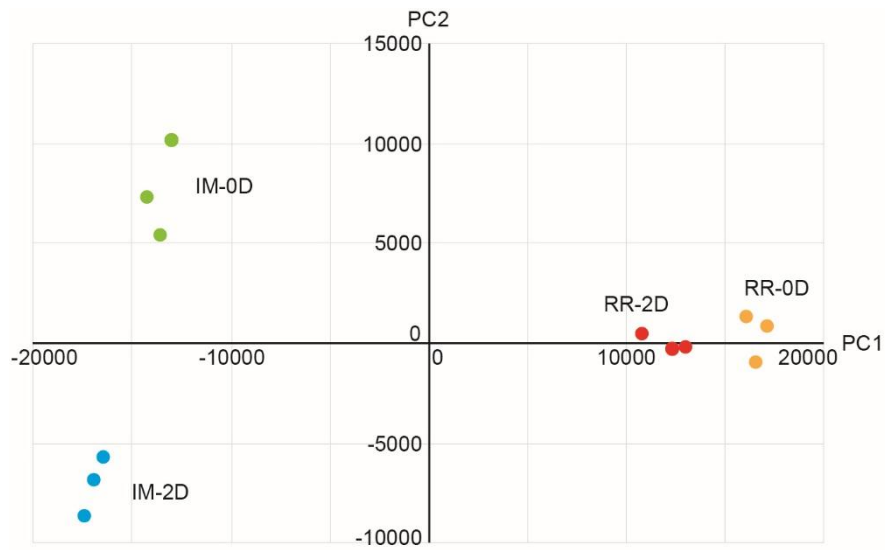

**Figure S1** Principle component analysis (PCA) of the RNA-seq datasets

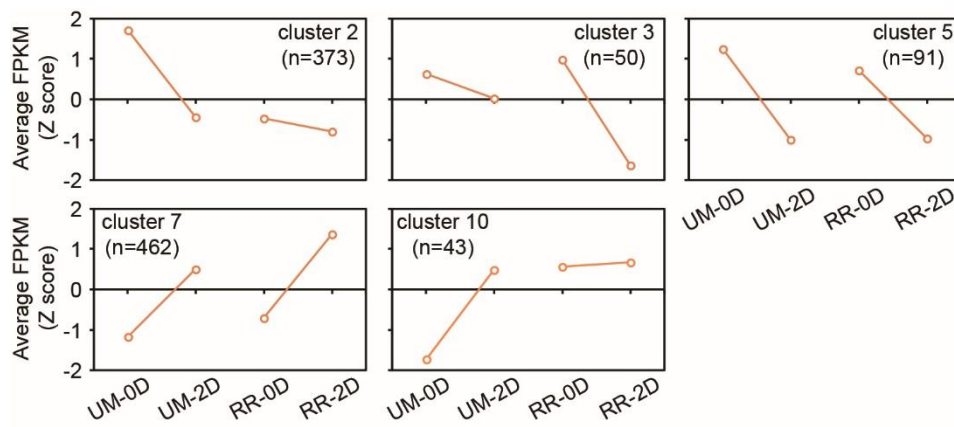

**Figure S2** Co-expression patterns of the DEGs identified by pairwise comparison of the four RNA-seq treatments. The y axis indicates the normalized FPKM (Z score).

**Table S1. Primer used for qRT-PCR analysis**

| Gene name         | Gene ID               | Primer sequence (5'-3')     |                            |
|-------------------|-----------------------|-----------------------------|----------------------------|
|                   |                       | Forward primer              | Forward primer             |
| <i>4CL</i>        | <i>Solyc06g068650</i> | TTCACCTCAGGGATATCATGCTCATC  | CATGTGAACAAGGTGAAGGATTATGC |
| <i>ANS</i>        | <i>Solyc08g080040</i> | GAACTAGCACTTGGCGTCGAA       | TTGCAAGCCAGGCACCATA        |
| <i>CHI</i>        | <i>Solyc05g010320</i> | CGGCGCAGGGAATAGAGGTTT       | CCGTCAAGGGCAAGATCATAGTCAC  |
| <i>DFR</i>        | <i>Solyc02g085020</i> | AGTCCAAGGATCCAGAGAACGAAGTA  | TGGACATCAAGAGTTCCAGCAGAT   |
| <i>F3H</i>        | <i>Solyc02g083860</i> | GTGAAAAGTTGATGGATTTGGC      | GTAATGGTTCCTGGATCGGTGTGT   |
| <i>F3'5'H</i>     | <i>Solyc11g066580</i> | GGTACATGTGGGATGGTTGTTGC     | ACTTCCAACGTGGTCCATAGGG     |
| <i>SLACTIN</i>    | <i>Solyc03g078400</i> | GGGATGGAGAAGTTTGGTGGTGG     | CTTCGACCAAGGGATGGTGTAGC    |
| <i>SLAN1</i>      | <i>Solyc09g065100</i> | CTAAGAGTGCCCGCATACAGAC      | ATCCGAAGTGGAGTGCTCAGATA    |
| <i>SLAN2-like</i> | <i>Solyc10g086290</i> | CAAGCTTCTAGGCAATAGATGGTCACT | TTGGTCGTGGTCGTAGTATAGTGC   |
| <i>SIHY5</i>      | <i>Solyc08g061130</i> | TCTATTGCCGCTAGTTCCTACTAC    | GGCACTCTTCTGATCTCATCAT     |

Primer sequences were taken from our previous study (Cao *et al.*, 2017).

**Table S2. Summary of the transcriptome data.**

| <b>Sample</b> | <b>Raw reads</b> | <b>Unique mapped reads</b> |
|---------------|------------------|----------------------------|
| IM-2D-1       | 26,687,545       | 22,359,437                 |
| IM-2D-2       | 23,249,026       | 19,525,114                 |
| IM-2D-3       | 22,911,485       | 18,981,050                 |
| RR-2D-1       | 23,699,982       | 20,168,114                 |
| RR-2D-2       | 24,725,132       | 20,955,826                 |
| RR-2D-3       | 23,641,723       | 20,076,151                 |
| IM-0D-1       | 25,668,053       | 21,570,979                 |
| IM-0D-2       | 25,685,396       | 21,360,007                 |
| IM-0D-3       | 25,613,901       | 21,393,245                 |
| RR-0D-1       | 22,959,477       | 19,475,948                 |
| RR-0D-2       | 21,924,746       | 18,555,827                 |
| RR-0D-3       | 22,655,264       | 19,221,291                 |
